# Supplementary material
Source: PubMed Central journal article supplement (PMC4070169)
Supplement: mmc2.pdf [file mmc2.pdf]

# Sodium and Proton Effects on Inward Proton Transport through Na/K Pumps

Travis J. Mitchell,<sup>†‡</sup> Camila Zugarramurdi,<sup>†</sup> J. Fernando Olivera,<sup>†</sup> Craig Gatto,<sup>‡</sup> and Pablo Artigas<sup>†\*</sup>

<sup>†</sup>Department of Cell and Molecular Physiology, Texas Tech University Health Sciences Center, Lubbock, Texas; and <sup>‡</sup>School of Biological Sciences, Illinois State University, Normal, Illinois

**ABSTRACT** The Na/K pump hydrolyzes ATP to export three intracellular Na ( $\text{Na}_i$ ) as it imports two extracellular K ( $\text{K}_o$ ) across animal plasma membranes. Within the protein, two ion-binding sites (sites I and II) can reciprocally bind Na or K, but a third site (site III) exclusively binds Na in a voltage-dependent fashion. In the absence of  $\text{Na}_o$  and  $\text{K}_o$ , the pump passively imports protons, generating an inward current ( $I_H$ ). To elucidate the mechanisms of  $I_H$ , we used voltage-clamp techniques to investigate the  $[\text{H}]_o$ ,  $[\text{Na}]_o$ , and voltage dependence of  $I_H$  in Na/K pumps from ventricular myocytes and in ouabain-resistant pumps expressed in *Xenopus* oocytes. Lowering  $\text{pH}_o$  revealed that  $\text{H}_o$  both activates  $I_H$  (in a voltage-dependent manner) and inhibits it (in a voltage-independent manner) by binding to different sites.  $\text{Na}_o$  effects depend on  $\text{pH}_o$ ; at  $\text{pH}_o$  where no  $\text{H}_o$  inhibition is observed,  $\text{Na}_o$  inhibits  $I_H$  at all concentrations, but when applied at  $\text{pH}_o$  that inhibits pump-mediated current, low  $[\text{Na}]_o$  activates  $I_H$  and high  $[\text{Na}]_o$  inhibits it. Our results demonstrate that  $I_H$  is a property inherent to Na/K pumps, not linked to the oocyte expression environment, explains differences in the characteristics of  $I_H$  previously reported in the literature, and supports a model in which 1), protons leak through site III; 2), binding of two Na or two protons to sites I and II inhibits proton transport; and 3), pumps with mixed Na/proton occupancy of sites I and II remain permeable to protons.

## INTRODUCTION

The Na, K-ATPase, or Na/K pump, is the P-type ATPase that builds the  $\text{Na}^+$  gradient that energizes most plasma membrane processes in animal cells, including excitability and secondary active transport. Under physiological and near-physiological conditions, this pump transports three  $\text{Na}^+$  ions out of the cell while importing two  $\text{K}^+$  ions for every ATP molecule hydrolyzed, with a fixed stoichiometry (1,2). The crystal structures of the Na/K pump with two  $\text{K}^+$  ions bound (3) and with three  $\text{Na}^+$  ions bound (4) show the location of the ion-binding sites and the residues that provide oxygen for ion coordination. There is one site, site III, that exclusively binds  $\text{Na}^+$ , whereas sites I and II can bind either  $\text{K}^+$  or  $\text{Na}^+$  (although the conformation of the two sites slightly differs between the Na-bound and K-bound states).

This article is concerned with the characteristics of a non-canonical mode of passive inward  $\text{H}^+$  transport that occurs through Na/K pumps. Noncanonical, passive fluxes have also been described in other active transporters (5,6). Normal Na/K pumps (wild-type pumps or pumps with mutations that reduce their affinity for ouabain) present an inward  $\text{H}^+$  current ( $I_H$ ) in the absence of external  $\text{Na}^+$  ( $\text{Na}_o^+$ ) and  $\text{K}^+$  ( $\text{K}_o^+$ ). Several mutations that induce large changes in the ion-binding characteristics, including C-terminal deletion of the  $\alpha$ -subunit, allow this leak to appear in the presence of physiological external  $\text{Na}^+$  concentration (7–9).

Originally found in endogenous Na/K pumps of *Xenopus* oocytes by Rakowski et al. (10),  $I_H$  has been studied subsequently by several laboratories in heterologously expressed Na/K pumps in *Xenopus* oocytes. Wang and Horisberger (11) demonstrated that this leak current is carried by  $\text{H}^+$  by showing that  $I_H$ -induced acidification of the oocyte's intracellular milieu and its reversal potential are dependent on external pH ( $\text{pH}_o$ ). The characteristics of  $I_H$  vary depending on the particular Na/K pump expressed; Li et al. (12) showed that mutations on a putative  $\text{Na}^+$  binding site, which altered the apparent affinity for  $\text{Na}_o^+$ , changed the amount of leak current observed in the absence of  $\text{Na}_o^+$ ; the higher the affinity of the mutant for  $\text{Na}_o^+$ , the larger was the  $I_H$  at pH 6 in the absence of  $\text{Na}_o^+$ . Later, our laboratory showed that deletion of the last five C-terminal residues in  $\alpha 1$  modified the characteristics of this leak, making it evident in the presence of physiological  $\text{Na}_o^+$  levels, a result confirmed by two other laboratories (8,9). Finally, mutation of a conserved aspartic acid that may form part of site III to asparagine completely eliminates  $I_H$ , consistent with observations that transient titration of this aspartic acid contribute to the  $\text{H}^+$  translocation pathway through the pump (14).

A possible pathophysiological relevance of  $I_H$  is highlighted by the work of Poulsen et al. (15) and Azizan et al. (16), who showed that human  $\alpha 2$  mutations that induce familial hemiplegic migraine (15) and human  $\alpha 1$  mutations that induce hyperaldosteronism and hypertension (16) present  $I_H$  at physiological  $[\text{Na}^+]_o$ . Thus, for instance, a large  $I_H$  may be responsible for the depolarization observed in adrenal-cortical adenomas that express these mutant  $\alpha 1$  pumps (17).

Submitted February 26, 2014, and accepted for publication April 23, 2014.

\*Correspondence: pablo.artigas@ttuhsc.edu

Travis J. Mitchell and Camila Zugarramurdi contributed equally to this work.

Editor: Ian Forster.

© 2014 by the Biophysical Society  
0006-3495/14/06/2555/11 \$2.00

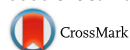

This study addresses major gaps in the current understanding of  $I_H$  to elucidate the mechanisms underlying its appearance and inhibition. We demonstrate that the  $H^+$  current, to date described only in oocytes, is present as well in a classical mammalian preparation used to study Na/K pumps under voltage clamp, a finding that could elucidate the contribution of this mode of action to the pathophysiology of human illness caused by mutants that disrupt ion binding. We also study the complex interaction between the effects of  $Na^+$  and those of  $H^+$  in ventricular myocytes and oocytes, focusing on the voltage dependence of the apparent affinities and on the interactions between the different ions. Our results 1), demonstrate that leak currents are a property inherent to Na/K pumps, that is, they are not attributable to changes in environment caused by their heterologous expression in oocytes; 2), shed light on the mechanisms that might be involved in the appearance of  $I_H$  in illness-related mutants under normal physiological conditions; 3), explain the differences between several laboratory studies of different Na/K pump mutants under different conditions; and 4), provide additional support for the suggestion that the  $H^+$  permeation site is the site responsible for the normal Na/K pump voltage dependence, believed to be site III (also known as the  $Na^+$ -exclusive site).

## METHODS

### Cell preparation

Guinea pig myocytes were isolated with slight modification of previously described methods (18). The heart was rapidly removed under pentobarbital anesthesia, mounted on a Langendorf system, and perfused with normal Tyrode's solution consisting of (in mM) 1.8  $CaCl_2$ , 145 NaCl, 5 KCl, 1  $MgCl_2$ , and 10 HEPES (pH 7.4) at 35°C. After the coronary arteries were clean of blood, the solution was changed to  $Ca^{2+}$ -free Tyrode's for 7 min, followed by application of an enzymatic solution (1 mg/mL collagenase type 1A and 0.2 mg/mL protease type XIV (Sigma, St. Louis, MO) dissolved in  $Ca^{2+}$ -free Tyrode's) for ~7 min, depending on the degree of digestion. The enzymatic solution was washed with a solution containing (in mM) 70 K-glutamate, 25 KCl, 20 taurine, 10  $KH_2PO_4$ , 1  $MgCl_2$ , 0.5 EGTA, 20 glucose, and 10 HEPES (pH 7.3). In this high- $K^+$  solution, the heart was cut, and myocytes were stored at 4°C before use within 36 h.

### Oocyte preparation and molecular biology

Oocytes were isolated enzymatically, injected with a mixture of  $\alpha 1\beta 3$  complementary RNAs, and maintained for 2–6 days postinjection as described previously (2). For electrophysiological experiments, we used the double mutant Q120R/N131D (RD), which has a lower ouabain sensitivity ( $IC_{50} \sim 100 \mu M$ ), allowing reversible inhibition of exogenous pumps and irreversible block of endogenous pumps ( $IC_{50} < 100 nM$ ). For comparison, some experiments were performed with ouabain-sensitive wild-type *Xenopus*  $\alpha 1\beta 3$ .

### Electrophysiology

All experiments were performed at room temperature, 20–23°C.

## Myocytes

Whole-cell patch-clamp recording of ventricular myocytes was performed with an Axopatch 200A, a Digidata 1322 A/D board, and pClamp 10 software (all from Molecular Devices, Sunnyvale, CA), with acquisition at 10 kHz, filtered at 2 kHz. Pipettes had resistances between 1 and 3 M $\Omega$  when filled with intracellular solution containing (in mM) 130 L-glutamic acid, 10 HEPES, 10 EGTA, 10 tetraethylammonium-Cl, 5 MgATP, 1  $MgCl_2$ , and 50 NaOH, pH 7.4 with ~100 mM CsOH. The external solution included (in mM) 130 methanesulfonic acid (MS), 10 HEPES, 10 MES (2-(N-Morpholino)ethanesulfonic acid), 5  $BaCl_2$ , 1  $MgCl_2$ , 1  $CaCl_2$ , 1  $CdCl_2$ , and 150 N-methyl D-glucamine (NMG) or NaOH (final pH 5.5–7.4 attained by adding MS or NMG). Intermediate  $Na^+$  concentrations were achieved by mixing the two solutions. Na/K-pump-mediated current was identified by inhibition with either ouabain (nearly irreversible) or the reversible steroids dihydroouabain (DHO) or strophanthidin (19).

## Oocytes

An OC-725C amplifier (Warner Instruments, Hamden, CT), a Digidata 1440 A/D board, a Minidigi 1A, and pClamp 10 software (Molecular Devices) were used for two-electrode voltage-clamp recordings. Signals were filtered at 2 kHz and digitized at 10 kHz. Resistance of both microelectrodes (filled with 3M KCl) was 0.5–1 M $\Omega$ . Oocytes were  $Na^+$ -loaded by 1-h incubation in a solution containing (in mM) 150 HEPES, 20 tetraethylammonium-Cl, and 0.2 EGTA (pH 7.2 with NaOH). They were then kept in  $Na^+$  recording solution until they were used for measurements. During loading, ouabain (10–20  $\mu M$ ) was applied to oocytes injected with RD- $\alpha 1$  but not to those injected with wild-type  $\alpha 1$ . External solutions were composed of (in mM) 120 NaOH or 120 mM NMG, 10 mM HEPES, 10 mM MES, 5 mM  $Ba(OH)_2$ , 1 mM  $Mg(OH)_2$ , 0.5 mM  $Ca(OH)_2$  (pH 4.0–7.6, as indicated, with MS). Intermediate  $Na^+$  concentrations were achieved by mixing the two solutions at the appropriate pH. External  $K^+$  was added from a 3 M  $K^+$ -MS stock.

## RESULTS

### Characteristics of Na/K-pump-mediated $I_H$ leak in guinea pig ventricular myocytes

To date, an Na/K-pump-mediated  $I_H$  has been observed only in *Xenopus* oocytes under voltage clamp. In the absence of both  $Na^+_o$  and  $K^+_o$ , different levels of  $I_H$  have been described in endogenous pumps (10), overexpressed *Xenopus*  $\alpha 1\beta 3$  pumps (11), or other exogenous ouabain-insensitive pumps (7,8,12,20). To our surprise, this current has not been reported in any other cell type, including ventricular myocytes (a classical preparation for studying Na/K pump electrophysiology); this is even more puzzling considering that oocytes expressing ouabain-insensitive pumps present robust  $I_H$  even at  $pH_o$  as high as 7.6, with current amplitude increasing as  $pH_o$  is lowered to pH 6.0 (11,20).

We looked for a cardiotonic steroid-sensitive  $I_H$  in guinea pig ventricular myocytes in the absence of  $Na^+_o$  (Fig. 1). Fig. 1, A and B, shows results from a representative myocyte in  $Na^+$ -free external solutions (with  $NMG^+$  as the main external cation). Fig. 1 A shows the family of curves generated by step voltage pulses applied from a holding potential ( $V_h$ ) of  $-40$  mV to the indicated voltages, under four conditions: with and without 2 mM DHO (a reversible Na/K

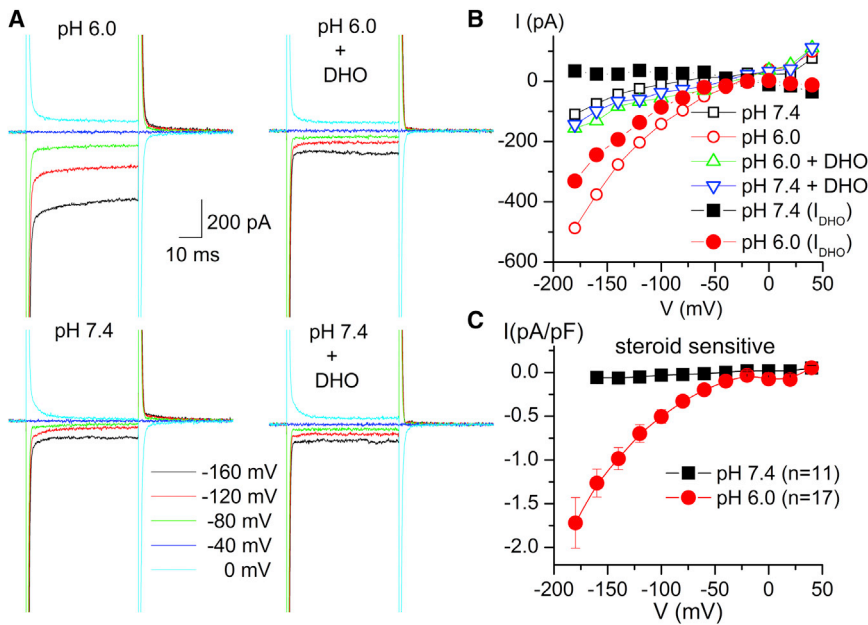

FIGURE 1  $I_H$  in whole-cell voltage-clamped ventricular myocytes at pH 6.0. (A) Currents induced by pulses from  $-40$  mV to the indicated voltages in a ventricular myocyte bathed by 150 mM NMG external solution at pH 6.0 (upper) and pH 7.4 (lower) in the absence (left) and presence (right) of 2 mM DHO. (B) Average current (last 5 ms of voltage pulses) from the myocyte in A, in the absence (open black squares) and presence (open blue triangles) of DHO and at pH 6.0 without (open red circles) and with (open green triangles) DHO; the DHO-sensitive current is plotted as solid black squares (pH 7.4) and solid red circles (pH 6.0). (C) Average DHO-sensitive current density (current normalized by cell capacitance to correct for natural differences in myocyte size) at pH 7.4 (black squares) and at pH 6.0 (red circles). Error bars represent the mean  $\pm$  SE.

pump inhibitor) at two pH values (7.4 and 6.0). Fig. 1 B displays the steady-state current measured with voltage pulses like those applied in Fig. 1 A at pH 7.4 in the absence (open black squares) and presence (open blue triangles) of DHO and at pH 6.0 without (open red circles) and with DHO (open green triangles). The DHO-sensitive current is plotted as solid black squares (pH 7.4) and solid red circles (pH 6.0). Fig. 1 C plots the average cardiotoxic steroid (CS)-sensitive current density at pH 7.4 (black squares) and at pH 6.0 (red circles). These experiments demonstrate for the first time, to our knowledge, that  $I_H$  is present in non-oocyte preparations.

To determine the  $H^+$  dependence of this current in myocytes, we also studied the  $pH_o$  dependence of  $I_H$  (Fig. 2). These experiments were performed in different myocytes where currents were normalized to cell capacitance to compare data from different cells. Fig. 2 A shows steady-state  $I/V$  curves and Fig. 2 B describes the  $[H^+]$  effect obtained from these curves. It is clear that the inward currents increase with  $H^+$  concentration and appear to saturate at  $pH_o$  5.5, i.e., at  $3 \mu M [H^+]$ . The fits of Hill equations with shared Hill number ( $n_H = 1.8$ ) gave the parameters listed in the figure legend, which suggest that there is a reduction in the affinity for  $H^+$  as the voltage becomes more positive.

To obtain a clearer picture of the interaction between  $Na^+$  and  $H^+$ , we evaluated the effects of  $Na^+$  on  $I_H$  at pH 6.0 (Fig. 3). Fig. 3 A shows the voltage dependence of CS-sensitive current in the presence of different  $Na^+$  concentrations. At all voltages, 1 and 5 mM  $Na^+$  significantly increased  $I_H$ , whereas higher  $Na^+$  concentrations inhibited  $I_H$ . Fig. 3 B shows the  $Na^+$  concentration dependence at four voltages.  $I_H$  is doubled by 5 mM  $Na^+$ , whereas 14 mM  $Na^+$  brings the current back to the values observed

at 0  $Na^+$ ; higher concentrations reduce the current even further. This  $Na^+$  dependence is qualitatively similar to, but quantitatively different from, those reported in *Xenopus* oocytes with overexpressed  $\alpha 1\beta 3$  pumps at  $pH_o$  6.0 (11) and in *Xenopus* oocytes with endogenous pumps at  $pH_o$  5.6 (21). The experiments described below, performed in *Xenopus* oocytes, aim to explain these discrepancies.

### Characteristics of Na/K pump-mediated inward $H^+$ leak ( $I_{H+}$ ) in *Xenopus* oocytes heterologously expressing *Xenopus* $\alpha 1\beta 3$ pumps

A detailed  $pH_o$  dependence of the  $I_H$  over a wide  $pH_o$  range is an important aspect of this mode of operation that has not been studied with the different Na/K pumps expressed in *Xenopus* oocytes. *Xenopus* oocytes under two-electrode voltage clamp are more tolerant to extreme pH values than are ventricular myocytes, and expression of ouabain-resistant RD- $\alpha 1\beta 3$  pumps makes it possible to perform full dose-response experiments in a single oocyte, thus avoiding the effects of cell-to-cell variation. Fig. 4 shows the  $pH_o$  dependence of inward leak currents. Fig. 4 A displays the continuous recording from an oocyte held at  $-50$  mV in which a full dose-response experiment was performed. Sharp vertical deflections of the current trace correspond to application of 100-ms pulses to measure voltage dependence. The experiment was initiated by adding 3 mM  $K^+$  to the NMG $^+$  external solution, a maneuver that induces an outward-directed Na/K pump current ( $I_P$ ). The solution was then switched to an NMG $^+$  external solution at pH 7.0, which induced a small inward current at  $-50$  mV that was inhibited by 10 mM ouabain. This maneuver was repeated five times, switching to different pH values, with each iteration followed by ouabain washout

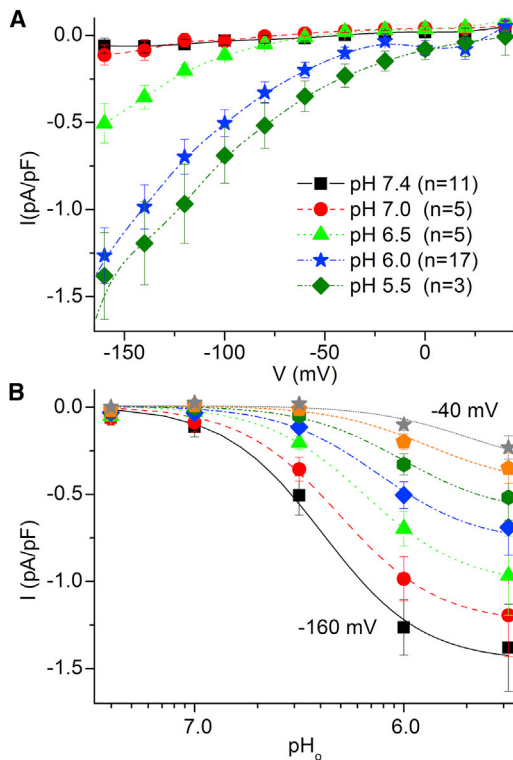

FIGURE 2 Leak currents depend on  $pH_o$  in ventricular myocytes. Experiments similar to those in Fig. 1 were performed in several myocytes using either DHO (2 mM), strophanthidin (1 mM) or ouabain (2 mM) to inhibit Na/K pumps after exposure to the desired  $pH_o$ . (A) Mean CS-sensitive current (normalized to cell capacitance) at indicated pH values is plotted as a function of voltage. Error bars represent the mean  $\pm$  SE. (B) External pH dependence of the current at each voltage obtained from the average I/V curves in A. Lines represent the fit of a Hill equation to the average data with the following parameters and errors: shared  $n_H = 1.8 \pm 0.3$ ,  $K_{0.5H}$  (in  $\mu$ M)  $0.41 \pm 0.11$  ( $-160$  mV, squares),  $0.49 \pm 0.13$  ( $-140$  mV, circles),  $0.65 \pm 0.19$  ( $-120$  mV, triangles),  $0.76 \pm 0.24$  ( $-100$  mV, diamonds),  $0.99 \pm 0.37$  ( $-80$  mV, side triangles),  $1.30 \pm 0.54$  ( $-60$  mV, hexagons), and  $2.05 \pm 1.3$  ( $-40$  mV, stars). To see this figure in color, go online.

for  $\sim 10$  min in a solution containing 120 mM  $Na^+$ . The ouabain-sensitive inward current increased as  $pH_o$  was reduced, but at pH values  $< 5.6$ , an initial increase in current was followed by a slower reduction.

Fig. 4 B shows the normalized ouabain-sensitive I/V curves from eight experiments performed as in Fig. 4 A; for simplicity, we only plot the current at the peak of the response at very low pH values. From these I/V curves we built the external  $pH_o$ -dependence plots at different voltages (Fig. 4 C). The fit of a Hill equation to these plots yielded a highly voltage-dependent  $K_{0.5H}$  that increased  $>$  tenfold over the voltage range at which  $I_H$  can be measured reliably (Fig. 4 C, inset). The high voltage sensitivity of activation by  $H^+$  is in contrast to the nearly voltage-independent inhibition by  $H^+$  (Fig. S1 in the Supporting Material). The different voltage dependencies indicate that activation and inhibition by  $H^+$  represent actions of this ion at at least two different sites.

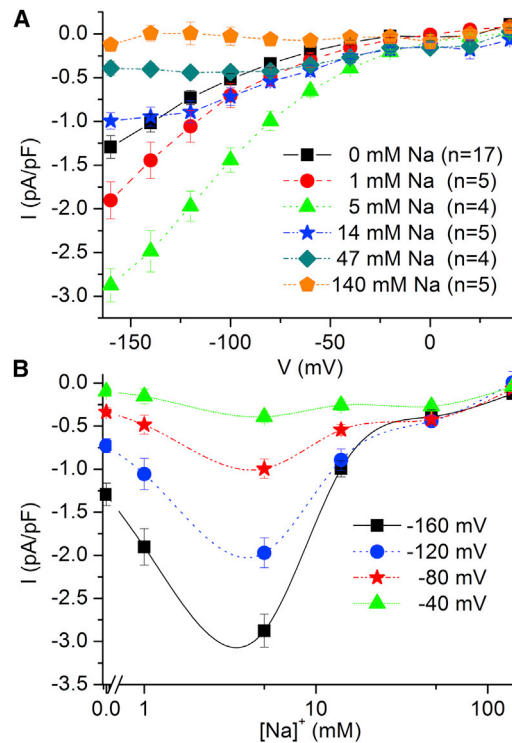

FIGURE 3 Effect of  $Na^+$  on  $I_H$  at pH 6.0 in ventricular myocytes. (A) Average CS-sensitive steady-state current (normalized to cell capacitance) at different  $Na^+$  concentrations. (B)  $[Na^+]$  dependence (from the data in A) at four voltages. To see this figure in color, go online.

To address whether the slow inhibition was due to intracellular  $H^+$  accumulation, and not to an effect of  $H^+$  on the binding sites, we modified the  $H^+$  gradient by changing the external voltage. That is, in terms of the  $H^+$  driving force, pH 5.0 at  $-50$  mV is equivalent to pH 6.0 at  $-110$  mV. Fig. 5 shows an example of such an experiment. External  $K^+$  reversibly activated  $I_P$ . After the current returned to its baseline value (in NMG at pH 7.6), an NMG solution at pH 5.0 was applied at  $-50$  mV, inducing a large inward current that slowly decreased, as described above. Two minutes after returning to pH 7.6, the voltage was switched to  $-110$  mV and an NMG solution at pH 6.0 was applied. The total inward current induced was similar to the  $I_H$  induced by pH 5.0 at  $-50$  mV, consistent with the high voltage dependence for  $H^+$  activation of  $I_H$ . However, the current did not show inhibition, consistent with the voltage dependence of inhibition being less than the voltage dependence for activation. To demonstrate that the currents induced by  $pH_o$  were all mediated by Na/K pumps, we repeated the measurements after application of 10 mM ouabain at both  $-50$  mV and  $-110$  mV. The increase in  $H^+$  concentration did not induce changes in leak currents in the presence of ouabain. This experiment demonstrates that the inhibition by low pH is not due to intracellular accumulation of  $H^+$  leaking through the pump.



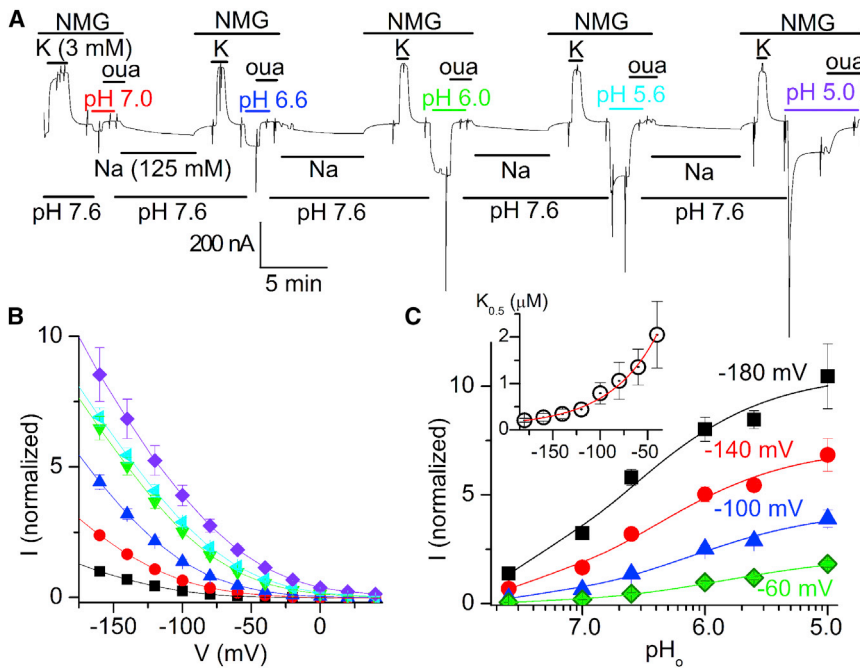

FIGURE 4  $pH_o$  dependence of  $I_H$  without  $Na^+$  and  $K^+$  in *Xenopus* oocytes. (A) Continuous recording from an oocyte expressing RD- $\alpha 1\beta 3$  held at  $-50$  mV. Maximum  $I_p$  was measured at 3 mM  $K^+$  without  $Na^+$  at  $pH_o$  7.6.  $pH_o$  was then lowered, inducing an inward holding current that was inhibited by subsequent application of ouabain. After an 8-min ouabain washout with 120 mM  $Na^+$  (to maintain internal Na loading), the maneuver was repeated again, first applying  $K^+$ , then lowering  $pH_o$ , then adding ouabain. Note that  $I_p$  is the same in each  $K^+$  application, indicating that all Na/K pumps recovered from inhibition before testing a different  $pH_o$ . Ramp-shaped vertical deflections are 100-ms-long pulses to different voltages. The current at the end of those pulses was used to obtain I/V curves. (B) Ouabain-sensitive current (normalized to  $I_H$  at  $-160$  mV,  $pH$  7.6, before lowering  $pH_o$ ) as a function of voltage. The data points are an average of eight oocytes where at least four different  $pH_o$  values were tested. The currents at  $pH$  5.6 and 5.0 were measured at the peak of the activation response, before significant inhibition had occurred. (C)  $pH$  dependence from the curves in B at the indicated voltages. The solid lines are global fits of Michaelis-Menten equations to the

data from individual cells with  $K_{0.5}$  (in  $\mu M$ )  $\pm$  fitting errors of  $0.20 \pm 0.04$  ( $-180$  mV, black),  $0.34 \pm 0.10$  ( $-140$  mV, red),  $0.79 \pm 0.23$  ( $-100$  mV, blue), and  $1.36 \pm 0.39$  ( $-60$  mV, green). The  $K_{0.5}$ -versus-voltage curve is plotted in the inset; the red line is a fit of the equation  $K_{0.5} = K_{0.5}^0 \exp(\lambda F/RT) + C$  to the data, with parameters  $K_{0.5}^0 = 4.4 \mu M$ ,  $\lambda = 0.51$ , and  $C = 0.07$ . R is the gas constant, F the Faraday constant, and T the temperature.

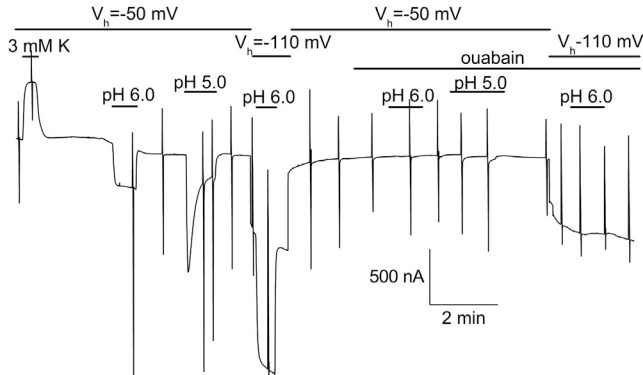

FIGURE 5 Current inhibition is not due to  $H^+$  accumulation. Shown is a continuous recording from an oocyte 3 days after injection with RNA for RD- $\alpha 1\beta 3$  bathed with NMG external solutions.  $I_p$  was activated by 3 mM  $K^+$  at  $pH$  7.6 at  $-50$  mV. After the current settled back to its baseline value in NMG, a  $pH$  6.0 solution was applied, inducing a steady inward current that disappeared when  $pH$  was returned to 7.6. Subsequent perfusion of  $pH$  5.0 solution induced a much larger current that decreased slowly. Two minutes after returning to  $pH$  7.6, the holding potential was stepped to  $-110$  mV and a  $pH$  6.0 solution was applied, inducing a large inward steady current. After application of 10 mM ouabain,  $pH$  changes at  $-50$  and  $-110$  mV did not induce inward current. To see this figure in color, go online.

The whole data set fitted by a Hill equation (line plots) yielded a voltage-independent  $K_{0.5}$  ( $\sim 7$  mM). A nearly identical inhibition by  $Na^+$  was observed at  $pH$  7.6, with a similar voltage-independent apparent affinity (cf. Fig. 8 C). These results are qualitatively different from the effects observed in myocytes at  $pH$  6.0, where a two-fold increase in  $I_H$  was induced by 5 mM  $Na^+$ , after which higher  $Na^+$  concentrations inhibited  $I_H$  (Fig. 3). Our results also differ from results reported for the wild-type  $\alpha 1\beta 3$  pump in *Xenopus* oocytes, where an  $\sim 20\%$  activation at 5 mM  $Na^+$  was followed by inhibition at higher  $[Na^+]_o$  (11). We did observe a small increase in current at 1 mM  $Na^+$  in oocytes overexpressing wild-type  $\alpha 1\beta 3$  pumps (Fig. S2).

$Na^+$  had a drastically different effect on ouabain-sensitive currents at  $pH$  5 (Fig. 7) and  $pH$  4.0 (Fig. S3). Fig. 7 A shows part of an experiment in which 0, 1, 2, 5, 12, 25, 50, and 120 mM  $Na^+$  were tested at  $pH$  5.0 in a single oocyte. Each application of the  $pH$  5.0 solution was preceded by a brief application of 3 mM  $K^+$  to ensure that the total number of pumps did not change. Applications of 1, 5, and 12 mM  $Na^+$  (after the inhibitory phase had stabilized at  $pH$  5.0) increased the inward current, whereas higher  $Na^+$  concentrations reduced  $I_H$ . The current measured at  $-160$  mV in this oocyte at all  $Na^+$  concentrations is shown in Fig. 7 B. The average normalized current data for concentrations where large numbers of oocytes were tested—1 (n = 13), 5 (n = 14), 25 (n = 8), and 120 mM  $Na^+$  (n = 18)—are shown in Fig. 7 C (2 and 12 mM were

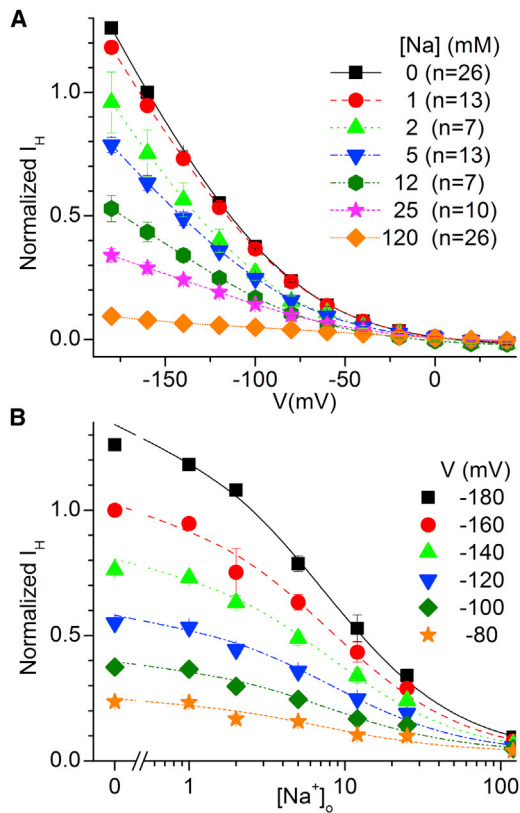

FIGURE 6  $Na^+$  inhibits  $I_H$  at pH 6.0. (A) Ouabain-sensitive  $I/V$  curves at the indicated  $[Na^+]_o$ . Currents were normalized to  $I_H$  measured at  $-160$  mV in the absence of  $Na^+$ . Data are expressed as the mean  $\pm$  SE. (B)  $[Na^+]_o$  dependence of inward currents at different voltages. Line plots are fits of a Michaelis-Menten equation to the whole data set from individual cells at each voltage with  $K_{0.5}$  (in mM)  $7.2 \pm 0.8$  ( $-180$  mV),  $7.9 \pm 1.3$  ( $-160$  mV),  $7.9 \pm 0.9$  ( $-140$  mV),  $7.9 \pm 1.1$  ( $-120$  mV),  $7.5 \pm 1.2$  ( $-100$  mV), and  $6.7 \pm 1.4$  ( $-80$  mV). To see this figure in color, go online.

only tested in two oocytes). Note that 25 mM  $Na^+$  induced a twofold increase of the current compared to 0 mM  $Na^+$ , similar to the observations on endogenous pumps at pH<sub>o</sub> 5.6 (cf. Fig. 5 in Vasilyev et al. (21)). Fig. S3 shows that the inhibitory effect of high external  $Na^+$  was not observed at pH 4, where 125 mM  $Na^+$  induced an even larger increase in current than did 5 mM  $Na^+$ .

Figs. 6 and 7 demonstrate that the interactions between  $Na^+$  and  $H^+$  are complex. It appears that at high  $H^+$  concentration, the first  $Na^+$  to bind externally (thought to interact with site I or site II) kicks the protons off the inhibitory sites. If inhibitory protons occupied transport sites I and II, one would expect them to compete with  $K^+$  and thus reduce the apparent affinity for  $K^+$  activation of  $I_p$  at pH 5.0. This is exactly the case, as shown in Fig. 8. Fig. 8 A shows the continuous recording from an experiment in which step changes in  $K^+$  concentration were performed at pH 5.0, inducing progressively larger outward current up to 3 mM  $K^+$ . Fig. 8 B shows activation by  $K^+$  in the same oocyte at pH 7.6. There is a clear reduction in  $K^+$  affinity induced

by 10  $\mu$ M  $H^+$ . The statistical significance of this difference is illustrated in Fig. 8 C, which plots the voltage dependence for the  $K_{0.5}$  for  $K^+$  in both conditions (i.e., nearly a 10-fold reduction in apparent affinity for  $K^+$  at pH 5.0 (open red circles) vs. pH 7.6 (solid red circles)). The same semilogarithmic plot also shows the effect of voltage on the apparent affinities described in this work. Note that activation of  $I_H$  by  $H^+$  (black squares) is the only apparent affinity that presents strong voltage dependence, whereas inhibition of  $I_H$  by  $Na^+$  at pH 6.0 (solid blue triangles) or 7.6 (open blue triangles) and activation of pump current by  $K^+$  at pH 7.6 (solid red circles) or 5.0 (open red circles) is nearly voltage-independent.

## DISCUSSION

### Characterization of Na/K-pump-mediated leak currents in a mammalian preparation

The first goal of our study was to use a classical ventricular myocyte preparation to demonstrate that  $I_H$  is a characteristic property intrinsic to Na/K pumps and not an artifact of the oocyte expression system. Such an artifact could arise, for instance, due to specific protein-lipid interactions in the oocyte membrane. Our results also demonstrate that the current has similar characteristics even in the presence of the normal regulatory subunits of the pump, in this case, phospholemman, FXYD1, which is prevalent in cardiac tissue (22–24).

Our results go beyond demonstrating that  $I_H$  is not a curiosity of the oocyte membrane. Its characteristics in ventricular myocytes are important to understanding the mechanisms involved and the pathophysiological consequences that could arise when the features of  $I_H$  are altered by Na/K-pump mutations that exhibit  $I_H$  at physiological  $Na^+$  concentrations. In this respect, Beuschlein et al. (17) recently demonstrated that mutations of the Na/K pump  $\alpha 1$  subunit in adenomas produce hyperaldosteronism-induced hypertension. Shortly thereafter, Azizan et al. (16) showed that most of the hyperaldosteronism-inducing mutants described the presence of leak currents at near-physiological salt concentration ( $\sim 100$  mM  $Na^+$ , 4 mM  $K^+$ ) in voltage-clamped oocytes. The authors suggested that this leak may be the cause of the depolarization reported by Beuschlein et al. in tumoral adrenal cells (17).

In addition, >50 mutations of the gene encoding the Na/K pump  $\alpha 2$  subunit (ATP1A2) have been linked to familial hemiplegic migraine (FHM) type II (25,26). Reportedly, patients with  $\alpha 2$  mutations present with varied symptoms that go from simple migraine to migraine with aura and epileptic episodes (see, e.g., Lebas et al. (27)). Although not all of the functional properties of these mutants have been reported, the mutants that have been characterized demonstrate important impairments in their enzymatic

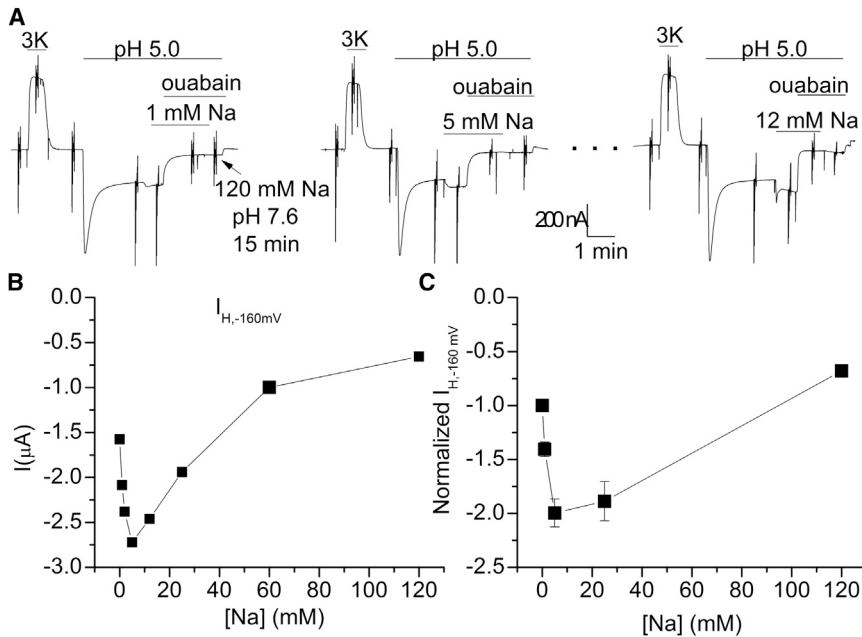

FIGURE 7 Effect of  $[Na^+]$  on ouabain-sensitive currents at pH 5.0. (A) Excerpt traces from a continuous recording from an oocyte where 0, 1, 2, 5, 12, 25, 50, and 120 mM  $Na^+$  were tested. Each application of pH 5.0 solution was preceded by an application of 3 mM  $K^+$  to ensure that the total number of pumps did not change. Applications of 1, 5, and 12 mM are shown after stabilization of  $I_H$  at pH 5.0. Ouabain was then added in the presence of  $Na^+$  and  $Na^+$  was then removed in the presence of steroid. Ouabain was washed out for 15 min in 120 mM  $Na^+$  (pH 7.6) before the next maneuver. (B) Full dose response for current activation at  $-160$  mV in the oocyte shown in A. (C) Mean  $\pm$  SE at  $-160$  mV, normalized to the steady-state current at 0  $Na^+$ , at concentrations where  $n > 8$ .

properties (25,28,29) or in their trafficking and expression at the plasma membrane (30). Indeed, leak currents at near-physiological  $Na^+$  and  $K^+$  concentrations have been reported in FHM- $\alpha 2$  mutants expressed in *Xenopus* oocytes (15,29). It is therefore conceivable, but has not yet been demonstrated, that the presence or absence of  $I_H$  at mammalian physiological  $Na^+$  concentrations plays a role in the pathogenesis of FHM. As discussed below, the detailed description of  $H^+$ - and  $Na^+$ -concentration dependencies of leak currents in myocytes and in ouabain-resistant pumps

in oocytes provides clues to the mechanisms underlying the leak at physiological  $Na^+$  concentrations upon mutation.

**pH<sub>o</sub> dependence of Na/K-pump-mediated leak currents**

The pH<sub>o</sub> dependence of leak currents has been studied previously in *Xenopus* oocytes using Na/K pumps from several sources and different Na-pump mutants. Most of the authors of those reports limited their evaluation to relatively high pH

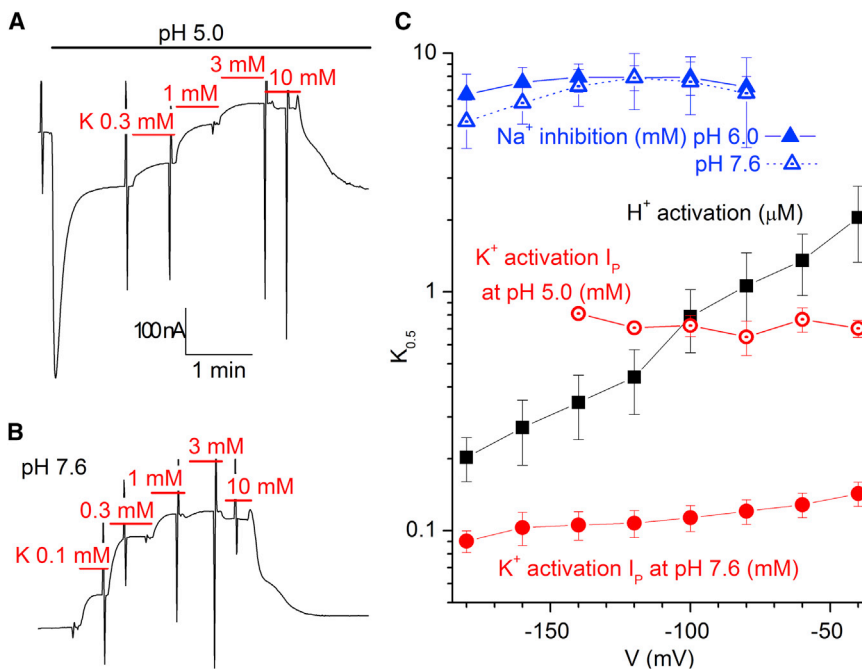

FIGURE 8 Reduction of  $K^+$  apparent affinity at high  $[H^+]$ . (A) Continuous trace from an oocyte held at  $-50$  mV, where step changes in  $[K^+]_o$  were performed at pH 5.0. After the normal biphasic response to pH 5.0, step changes in  $[K^+]_o$  activated outward  $I_p$  in a saturating, reversible fashion. (B) Continuous trace from the oocyte in A showing the increase in  $I_p$  in response to step changes in  $[K^+]_o$ . Note the difference in percentage of current induced by subsaturating  $[K^+]_o$ , compared to A. (C) Voltage dependence of  $K_{0.5}$  for the different effects on the RD- $\alpha 1\beta 3$  pump described in this article. Note the logarithmic scale. The units for the different apparent dissociation constants are indicated in the plot label.  $K_{0.5}$  for  $K^+$  activation of  $I_p$  at pH 5.0 represents the mean  $\pm$  SE from five oocytes and those at pH 7.6 are the mean  $\pm$  SE from 12 experiments. The other  $K_{0.5}$  and their error bars come from the fits described in Figs. 4 and 6 (except for Na inhibition at pH 7.6, from experiments similar to those in Fig. 6, but not shown).

values, and the inhibitory effects of the very low pH values used here were never demonstrated. Our results show that  $H^+$  induces a more complex response than previously thought, and they strongly suggest that the two different phenomena featured in this response, activation and inhibition, result from interactions with different ion-binding sites.

Wang and Horisberger (11) demonstrated that protons are the permeating ion through this noncanonical mode of transport by the Na/K pump, whereas Efthymiadis et al. (31) studied the pH dependence of steady-state endogenous pump currents in *Xenopus* oocytes at pH values between 7.3 and 6.3. Those authors reported a mildly voltage-dependent  $K_{0.5}$  for  $H^+$  with a Hill coefficient of 1.79 and also observed activation by external  $Na^+$  at pH 6.5, indicating that in endogenous pumps,  $H^+$  partially inhibits the current at pH 6.5. Our results in ventricular myocytes were similar, with a relatively mildly voltage-dependent  $K_{0.5}$  for  $H^+$  and a Hill coefficient of 1.8. We believe that inhibition by  $H^+$  (discussed below) generates a higher apparent affinity for  $H^+$  activation (because the inhibition would appear initially as saturation of activation). It is important to note that even with this misleading increased affinity, the apparent affinity for  $H^+$  activation in myocytes is lower than that in oocytes.

Because we can separate inhibition from activation over a wide  $pH_o$  range, the data in Fig. 4 C more accurately display the true  $pH_o$  dependence of current activation. The inset convincingly shows a strong voltage dependence of  $H^+$  activation. The exponential voltage dependence of  $K_{0.5H}$  (Fig. 4 C, inset) translates to an electrical distance,  $\lambda = 0.51$ , similar to the distance of  $\lambda = 0.49$  reported by Sagar and Rakowski (32) for  $Na^+$  inhibition of endogenous *Xenopus* Na/K-pump currents, but lower than  $\lambda = 0.71$  and 0.69, values reported for the slow component of  $Na^+$ -dependent transient charge movement in squid giant axons (33) and endogenous Na/K pumps in oocytes (34), respectively. Nevertheless, Fig. 8 clearly shows the stronger voltage-dependent activation of  $I_H$  compared to the activation of pump current by  $K^+$  or  $Na^+$  inhibition of leak currents at pH values of 7.6 and 6.0 (also shown in Fig. 6). Based on this strong voltage dependence, our data support previous proposals indicating that protons leak through the site responsible for  $Na^+$ - and voltage-dependent inhibition of pump current (12,14).

### Inhibition by $H^+$

A finding of this work, that to our knowledge is new, is the dual effect of  $H^+$ , i.e., that low pH not only activates a current but paradoxically also inhibits the current. Reasons why the biphasic activation/inhibition response described here may not have been reported before are that 1), it would not be evident if the inhibitory effect is nearly as fast as the activation, which could be the case in endogenous pumps, since they seem to have higher affinity for  $H^+$  inhi-

bition; or 2), if the solution exchange is too slow, it may be impossible to distinguish the activation phase from the inhibition phase. Also, a small biphasic response could be easily overlooked as an effect unrelated to the pump, particularly if irreversible inhibitors are used, as is the case with ouabain in endogenous pumps in oocytes.

Initially, based on the slow kinetics of inhibition at pH 5.0 ( $\tau = 11.1 \pm 0.6$  s ( $n = 13$ )), we favored the idea that intracellular proton accumulation was responsible for these effects. However, the experiment in Fig. 5 demonstrates that the protons leaking through the Na/K pump do not inhibit  $I_H$  due to accumulation. Intracellular accumulation would also be unlikely, as we  $Na^+$ -load the oocytes with a 150 mM HEPES solution (pH 7.2 with NaOH; see Methods) and HEPES (molecular mass 238 g/mol) is expected to enter the oocyte during the 1-h Na-loading procedure because it is clearly small enough to permeate connexins opened by the loading treatment. Molecules as big as gluconate<sup>-</sup> (molecular mass 196 g/mol) and tetrabutylammonium<sup>+</sup> (molecular mass 259 g/mol) are just fivefold less permeable than  $K^+$  through endogenous connexins (35), whereas the larger sucrose, and even ATP, can permeate purified connexin 26 (36). A high HEPES concentration would thus provide ample intracellular buffering capacity. Consequently, the next logical mode of action to investigate was whether this effect may be due to  $H^+$  binding to ion-transport sites.

Transport of  $H^+$  as a substitute for  $Na^+$  or  $K^+$  in the Na/K pump has been reported previously (37,38). Apell et al. (38) demonstrated that the stoichiometry of the pump exchanging  $H^+$  for  $H^+$  is not electrogenic, but more relevant for our study, the authors addressed  $H^+$  binding to extracellular sites in E2P. It can be seen from Fig. 4 in their study using purified enzyme that only above 1  $\mu$ M  $H^+$  (below pH 6.0) is there more than one site significantly occupied by  $H^+$ , with the two sites being saturated at pH  $\sim$ 5.0 (from extrapolation of the dotted line). These observations are in quantitative agreement with the idea that two protons occupy sites I and II at pH  $<$ 5.0, where  $>$ 80% of  $I_H$  is inhibited in our RD-mutant pumps (Fig. S1). It seems that there is no significant  $2H^+/3Na^+$  exchange, because maximal  $K^+$ -induced currents at pH 5.0 have amplitudes similar to those at pH 7.6. However, we cannot rule out the possibility that the ATPase is working with a reduced  $Na^+$  stoichiometry, similar to that described for  $H^+/H^+$  exchange (38). Also, it should be pointed out that when we talk about  $H^+$  at the ion-binding sites, we are suggesting not titration of acidic side chains, as recently reported to modulate K/Na selectivity (39), but rather binding of  $H^+$  or hydronium as substitutes for the transported ions.

The strong suggestion that protons occupy the  $K^+$  binding sites at 10  $\mu$ M  $H^+$  is based on the large reduction in  $K^+$  apparent affinity at pH 5.0 ( $\sim$ 10-fold; Fig. 8), which is consistent with competition between the two cations. Taking this result together with the observation that neither inhibition by  $H^+$  nor that by  $Na^+$  is voltage-dependent



at pH values 7.6 and 6.0 (Figs. S1 and S3, respectively, and Fig. 8 B), similar to the well established finding that external  $K^+$  binding is mildly voltage-dependent (32,40) (Fig. 8), directly supports a model in which inhibition of  $I_H$  by external cations requires binding to the sites that are not responsible for the Na/K-pump voltage dependence. Although the contribution of sites I and II to voltage-dependent inhibition has not been established, reports indicate that disruption of site III almost completely abolishes the pump's voltage dependence. Therefore, our results support the notion that binding of two protons, two  $K^+$ , or two  $Na^+$  ions to sites I and II inhibits leak currents that normally occur through site III. Whether blocking of the leak reflects mere ion binding or the concomitant conformational change that follows binding of two ions from a single ion species to sites I and II remains to be elucidated.

### Activation by $Na^+$ at low $pH_o$

A biphasic effect of  $Na^+$  on leak currents, activating at lower and inhibiting at higher  $Na^+$  concentrations, was previously reported for ouabain-sensitive pumps (11,21,31), but as those articles addressed  $Na^+$  effects at a single  $pH_o$ , the link between  $H^+$  inhibition and  $Na^+$  activation was not identified. We believe that this complex interaction between  $Na^+$  and  $H^+$  underlies the difficulties and controversies regarding the mechanisms involved in leak-current generation, as many of the characteristic differences in  $I_H$  reported to date in different systems can be explained by small shifts in apparent affinities for these two ions at the different sites.

Vedovato and Gadsby (8) reported that compared to wild-type  $\alpha 1\beta 3$  pumps, the ouabain-insensitive RD- $\alpha 1\beta 3$  mutant (used here) has an approximately twofold lower affinity for both  $Na^+_o$  and  $K^+_o$ . Along these lines, the activation by  $Na^+$  observed at pH 6.0 in wild-type  $\alpha 1\beta 3$  pumps (Fig. S2) (11), endogenous *Xenopus* pumps (21,31), and guinea pig ventricular pumps (Fig. 3), compared to the RD mutant, may also reflect a higher affinity for  $H^+$  at sites I and II and thus have a higher occupancy of these sites by  $H^+$  at higher  $pH_o$  values. This will make  $Na^+$ -induced activation more evident, as it appears to reflect relief of  $H^+$  inhibition. In other words, the leak would be activated by  $Na^+$  when  $Na^+$  kicks off one  $H^+$  from the fraction of pumps with two bound  $H^+$  ions, giving rise to pumps with mixed occupancy of one  $H^+$  and one  $Na^+$ , which permits leakage through site III.

It could be argued that our hypothesis is wrong because the nearly twofold increase induced by 5 mM  $Na^+$  in ventricular myocytes means that these pumps should have been at least ~50% inhibited by  $H^+$  at pH 6, and that this should have been observed in the  $H^+$  dependence of  $I_H$  shown in Fig. 2. However, we must note that the affinity for  $H^+$  activation at negative voltages is reduced in myocytes in steady state compared to that in oocytes at the

peak of low  $pH_o$  activation (cf. legends of Fig. 2 and Fig. 4). This is so even when the inhibitory effect of  $H^+$  gives a larger apparent affinity for activation by  $H^+$  in the myocyte. Thus, the lack of clear inhibition in the dose-response curve of Fig. 2 may reflect the reduced apparent affinity for  $H^+$  at site III in ventricular myocytes.

It is obvious that activation by  $Na^+$  cannot reflect binding to the  $H^+$  permeation site, as this will result in inhibition. It is also unlikely that permeation of  $Na^+$  occurs through the  $Na^+$ -exclusive site, because if that were the case, we would expect to observe  $I_H$  when applying low  $Na^+_o$  at higher  $pH_o$  values, something that has not been reported in wild-type or ouabain-resistant pumps (except for mutations with large effects on ion binding, discussed below) in the ample body of literature dealing with various mammalian or oocyte systems. Likewise, we did not observe  $Na^+$  stimulation of  $I_H$  at pH 7.6 or at pH 6.0 in RD pumps. Finally, the inhibitory effect of high  $Na^+$  at pH 5.0, where significant inward current is observed (Fig. 7), or the lack of inhibition by 125 mM  $Na^+$  at pH 4.0 (Fig. S3), where only current activation is observed, demonstrates a much lower apparent affinity for inhibition at pH 4.0 and 5.0 than at pH 6.0 or 7.6 (Figs. 6 and 8 B). Therefore, observations at pH 4.0 and 5.0 are consistent with a reduced affinity for binding of Na to site II due to  $H^+$  (or hydronium) occupancy of the sites, the interpretation we favor.

The biphasic effects of extracellular  $Na^+$  on inward current (activation and then inhibition) are similar but in opposite direction to its effects on Na-ATPase activity (41) or ATP-ADP exchange (42), two functional modes of the Na/K pump that are inhibited by low concentrations and activated by high concentrations of external  $Na^+$ . These  $Na^+$  effects on  $I_H$  may reflect interactions of the  $Na^+$  ions with the same sites they interact with in these other modes of operation. Alternatively, the activation by  $Na^+$  may reflect binding to a nontransport allosteric site similar to the one recently proposed in ventricular myocytes (43). However, this interpretation still requires the displacement of a previously bound  $H^+$  and cannot easily explain the large reduction of  $K^+$  apparent affinity at high  $H^+$  concentration.

### Mechanism of the effects of mutations that modify leak currents

As discussed above, robust leak currents have been described at physiological external  $H^+$ ,  $K^+$ , and  $Na^+$  concentrations in mutants that induce hypertension (16) or familial hemiplegic migraine (15,29). These leak currents are accompanied by large modifications of the Na/K-pump ion-binding reactions. Similar leaks associated with large modifications of ion-binding reactions have been observed at physiological pH and  $Na^+$  concentrations in Na/K pumps with C-terminal deleted  $\alpha$  subunits (7,8,9). Although several mechanisms may be involved in induction of leak currents by the diverse mutations, our results lead us to speculate

about one possible mechanism involved in induction of such leaks at physiological  $\text{Na}^+$  concentrations, and to explain the effects of  $\text{Na}^+$ -activating leak currents in pumps with C-terminal deletions.

For instance, the monotonic increase in leak current induced by increasing  $\text{Na}^+$  concentrations at  $\text{pH}_o$  7.6 in C-terminally deleted pumps (RD- $\Delta$ KESYY (7)) may reflect an altered affinity between  $\text{Na}^+$  and  $\text{H}^+$  for sites I and II such that more double- $\text{H}^+$  occupancy at pH 7.6 in the absence of  $\text{Na}^+$  leads to an increase in current. Then, as the  $\text{Na}^+$  concentration is raised at this very low  $\text{H}^+$  concentration, a mixed occupancy of sites I and II by  $\text{Na}^+$  and  $\text{H}^+$  at pH 7.6 is favored, which allows  $\text{H}^+$  leak through site III. Future studies of the combined effects of protons and  $\text{Na}^+$  on these mutants, over a broad range of ion concentrations, may provide a definitive resolution to this issue.

## SUPPORTING MATERIAL

Three figures are available at [http://www.biophysj.org/biophysj/supplemental/S0006-3495\(14\)00473-1](http://www.biophysj.org/biophysj/supplemental/S0006-3495(14)00473-1).

*Note added in proof:* At the time this article was under revision, an article addressing the effect of ion-binding site mutagenesis on leak currents mediated by Na/K pumps expressed in oocytes was published by Vedovato and Gadsby (44). Their proposal of protons transiting the Na-exclusive site III is consistent with our findings.

We thank Dr. Luis Reuss for comments on the manuscript, Beatriz A. Velez for excellent technical assistance in oocyte, myocyte, and solution preparation, and Sukanyalakshmi Chebrolu for help with the experiments at pH 4.0 (illustrated in Fig. S3).

This work was supported by grants from the National Science Foundation (MCB-1243842) to P.A. and From NIH (GM061583) to C.G.

## REFERENCES

- Sen, A. K., and R. L. Post. 1964. Stoichiometry and localization of adenosine triphosphate-dependent sodium and potassium transport in the erythrocyte. *J. Biol. Chem.* 239:345–352.
- Rakowski, R. F., D. C. Gadsby, and P. De Weer. 1989. Stoichiometry and voltage dependence of the sodium pump in voltage-clamped, internally dialyzed squid giant axon. *J. Gen. Physiol.* 93:903–941.
- Shinoda, T., H. Ogawa, ..., C. Toyoshima. 2009. Crystal structure of the sodium-potassium pump at 2.4 Å resolution. *Nature.* 459:446–450.
- Kanai, R., H. Ogawa, ..., C. Toyoshima. 2013. Crystal structure of a  $\text{Na}^+$ -bound  $\text{Na}^+/\text{K}^+$ -ATPase preceding the E1P state. *Nature.* 502:201–206.
- Binda, F., B. J. Lute, ..., A. Galli. 2006. The N-terminus of the norepinephrine transporter regulates the magnitude and selectivity of the transporter-associated leak current. *Neuropharmacology.* 50:354–361.
- Ryan, R. M., and J. A. Mindell. 2007. The uncoupled chloride conductance of a bacterial glutamate transporter homolog. *Nat. Struct. Mol. Biol.* 14:365–371.
- Yaragatupalli, S., J. F. Olivera, ..., P. Artigas. 2009. Altered  $\text{Na}^+$  transport after an intracellular  $\alpha$ -subunit deletion reveals strict external sequential release of  $\text{Na}^+$  from the Na/K pump. *Proc. Natl. Acad. Sci. USA.* 106:15507–15512.
- Vedovato, N., and D. C. Gadsby. 2010. The two C-terminal tyrosines stabilize occluded Na/K pump conformations containing Na or K ions. *J. Gen. Physiol.* 136:63–82.
- Meier, S., N. N. Tavraz, ..., T. Friedrich. 2010. Hyperpolarization-activated inward leakage currents caused by deletion or mutation of carboxy-terminal tyrosines of the  $\text{Na}^+/\text{K}^+$ -ATPase  $\alpha$  subunit. *J. Gen. Physiol.* 135:115–134.
- Rakowski, R. F., L. A. Vasilets, ..., W. Schwarz. 1991. A negative slope in the current-voltage relationship of the  $\text{Na}^+/\text{K}^+$  pump in *Xenopus* oocytes produced by reduction of external  $[\text{K}^+]$ . *J. Membr. Biol.* 121:177–187, (K+).
- Wang, X., and J. D. Horisberger. 1995. A conformation of  $\text{Na}^+/\text{K}^+$  pump is permeable to proton. *Am. J. Physiol.* 268:C590–C595.
- Li, C., K. Geering, and J. D. Horisberger. 2006. The third sodium binding site of Na,K-ATPase is functionally linked to acidic pH-activated inward current. *J. Membr. Biol.* 213:1–9.
- Reference deleted in proof.
- Nyblom, M., H. Poulsen, ..., P. Nissen. 2013. Crystal structure of  $\text{Na}^+/\text{K}^+$ -ATPase in the  $\text{Na}^+$ -bound state. *Science.* 342:123–127.
- Poulsen, H., H. Khandelia, ..., P. Nissen. 2010. Neurological disease mutations compromise a C-terminal ion pathway in the  $\text{Na}^+/\text{K}^+$ -ATPase. *Nature.* 467:99–102.
- Azizan, E. A., H. Poulsen, ..., M. J. Brown. 2013. Somatic mutations in ATP1A1 and CACNA1D underlie a common subtype of adrenal hypertension. *Nat. Genet.* 45:1055–1060.
- Beuschlein, F., S. Boulkroun, ..., M. Reincke. 2013. Somatic mutations in ATP1A1 and ATP2B3 lead to aldosterone-producing adenomas and secondary hypertension. *Nat. Genet.* 45:440–444.
- Artigas, P., G. Ferreira, ..., G. Pizarro. 2003. Effects of the enantiomers of BayK 8644 on the charge movement of L-type Ca channels in guinea-pig ventricular myocytes. *J. Membr. Biol.* 193:215–227.
- Artigas, P., and D. C. Gadsby. 2004. Large diameter of palytoxin-induced Na/K pump channels and modulation of palytoxin interaction by Na/K pump ligands. *J. Gen. Physiol.* 123:357–376.
- Ratheal, I. M., G. K. Virgin, ..., P. Artigas. 2010. Selectivity of externally facing ion-binding sites in the Na/K pump to alkali metals and organic cations. *Proc. Natl. Acad. Sci. USA.* 107:18718–18723.
- Vasilyev, A., K. Khater, and R. F. Rakowski. 2004. Effect of extracellular pH on presteady-state and steady-state current mediated by the  $\text{Na}^+/\text{K}^+$  pump. *J. Membr. Biol.* 198:65–76.
- Crambert, G., M. Fuzesi, ..., K. Geering. 2002. Phospholemman (FXVD1) associates with Na,K-ATPase and regulates its transport properties. *Proc. Natl. Acad. Sci. USA.* 99:11476–11481.
- Despa, S., J. Bossuyt, ..., D. M. Bers. 2005. Phospholemman-phosphorylation mediates the  $\beta$ -adrenergic effects on Na/K pump function in cardiac myocytes. *Circ. Res.* 97:252–259.
- Bossuyt, J., S. Despa, ..., D. M. Bers. 2009. Isoform specificity of the Na/K-ATPase association and regulation by phospholemman. *J. Biol. Chem.* 284:26749–26757.
- Morth, J. P., H. Poulsen, ..., P. Nissen. 2009. The structure of the  $\text{Na}^+/\text{K}^+$ -ATPase and mapping of isoform differences and disease-related mutations. *Philos. Trans. R. Soc. Lond. B, Biol. Sci.* 364:217–227.
- Pietrobon, D., and M. A. Moskowitz. 2013. Pathophysiology of migraine. *Annu. Rev. Physiol.* 75:365–391.
- Lebas, A., L. Guyant-Maréchal, ..., D. Parain. 2008. Severe attacks of familial hemiplegic migraine, childhood epilepsy and ATP1A2 mutation. *Cephalalgia.* 28:774–777.
- Blostein, R., L. Segall, and J. J. Gargus. 2006. ATP1A2: a key player in familial hemiplegic migraine. *Med. Sci. (Paris).* 22:341–343.
- Tavraz, N. N., T. Friedrich, ..., M. Dichgans. 2008. Diverse functional consequences of mutations in the  $\text{Na}^+/\text{K}^+$ -ATPase  $\alpha$ 2-subunit causing familial hemiplegic migraine type 2. *J. Biol. Chem.* 283:31097–31106.
- Tavraz, N. N., K. L. Dürr, ..., T. Friedrich. 2009. Impaired plasma membrane targeting or protein stability by certain ATP1A2 mutations

- identified in sporadic or familial hemiplegic migraine. *Channels (Austin)*. 3:82–87.
31. Efthymiadis, A., and W. Schwarz. 1991. Conditions for a backward-running  $\text{Na}^+/\text{K}^+$  pump in *Xenopus* oocytes. *Biochim. Biophys. Acta*. 1068:73–76.
  32. Sagar, A., and R. F. Rakowski. 1994. Access channel model for the voltage dependence of the forward-running  $\text{Na}^+/\text{K}^+$  pump. *J. Gen. Physiol.* 103:869–893.
  33. Holmgren, M., J. Wagg, ..., D. C. Gadsby. 2000. Three distinct and sequential steps in the release of sodium ions by the  $\text{Na}^+/\text{K}^+$ -ATPase. *Nature*. 403:898–901.
  34. Holmgren, M., and R. F. Rakowski. 1994. Pre-steady-state transient currents mediated by the Na/K pump in internally perfused *Xenopus* oocytes. *Biophys. J.* 66:912–922.
  35. Zhang, Y., D. W. McBride, Jr., and O. P. Hamill. 1998. The ion selectivity of a membrane conductance inactivated by extracellular calcium in *Xenopus* oocytes. *J. Physiol.* 508:763–776.
  36. Fiori, M. C., V. Figueroa, ..., G. A. Altenberg. 2012. Permeation of calcium through purified connexin 26 hemichannels. *J. Biol. Chem.* 287:40826–40834.
  37. Polvani, C., and R. Blostein. 1988. Protons as substitutes for sodium and potassium in the sodium pump reaction. *J. Biol. Chem.* 263:16757–16763.
  38. Apell, H. J., G. Benz, and D. Sauerbrunn. 2011. Proton diet for the sodium pump. *Biochemistry*. 50:409–418.
  39. Yu, H., I. M. Ratheal, ..., B. Roux. 2011. Protonation of key acidic residues is critical for the  $\text{K}^+$ -selectivity of the Na/K pump. *Nat. Struct. Mol. Biol.* 18:1159–1163.
  40. Heyse, S., I. Wuddel, ..., W. Stürmer. 1994. Partial reactions of the Na,K-ATPase: determination of rate constants. *J. Gen. Physiol.* 104:197–240.
  41. Glynn, I. M., and S. J. Karlish. 1976. ATP hydrolysis associated with an uncoupled sodium flux through the sodium pump: evidence for allosteric effects of intracellular ATP and extracellular sodium. *J. Physiol.* 256:465–496.
  42. Kaplan, J. H., and R. J. Hollis. 1980. External Na dependence of ouabain-sensitive ATP:ADP exchange initiated by photolysis of intracellular caged-ATP in human red cell ghosts. *Nature*. 288:587–589.
  43. Garcia, A., N. A. Fry, ..., R. J. Clarke. 2013. Extracellular allosteric  $\text{Na}^+$  binding to the  $\text{Na}^+,\text{K}^+$ -ATPase in cardiac myocytes. *Biophys. J.* 105:2695–2705.
  44. Vedovato, N., and D. C. Gadsby. 2014. Route, mechanism, and implications of proton import during  $\text{Na}^+/\text{K}^+$  exchange by native  $\text{Na}^+/\text{K}^+$ -ATPase pumps. *J. Gen. Physiol.* 143:449–464.

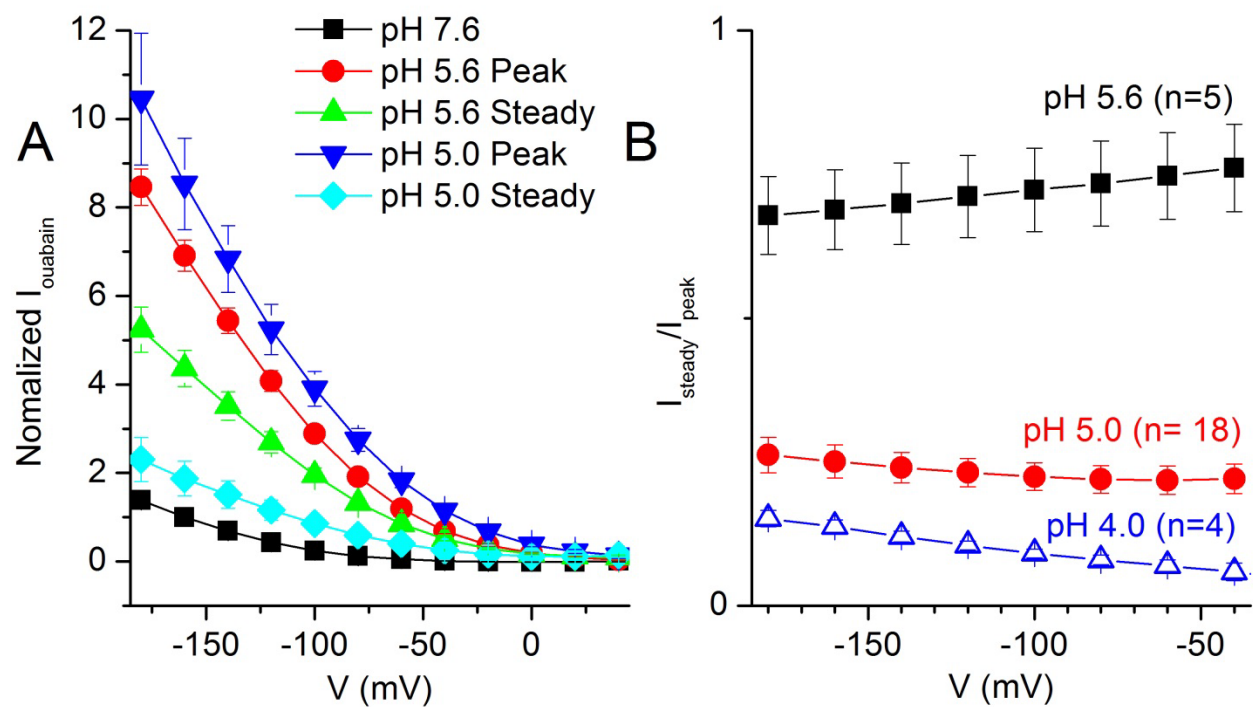

**Supplementary Fig. 1.** Peak and steady state currents at  $pH_o$  5.6 and 5.0. A) Ouabain-sensitive I-V curves measured at the peak of activation and after equilibration of the current at  $pH_o$  7.6, 5.0 and 5.6, normalized by  $I_H$  at -160 mV at pH 7.6. B) Ratio of the ouabain-sensitive steady state current and the current measured at the maximum activation by  $H^+$  was calculated for each individual oocyte and the mean  $\pm$  SE from the number of oocytes in parenthesis are shown. Inhibition by  $H^+$  is voltage independent. The data pH 4.0 (blue triangles) is from the experiments in Fig. S3.



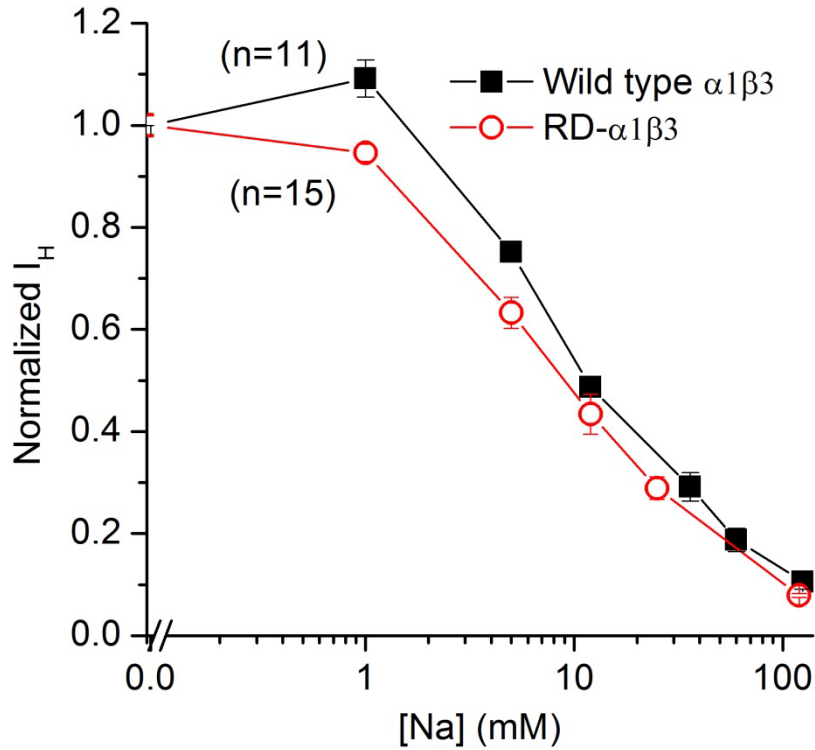

**Supplementary Fig. 2.** Effect of  $\text{Na}^+$  on the  $I_H$  induced at -160 mV at pH 6. Averaged data from oocytes overexpressing wild type ouabain-sensitive  $\alpha 1\beta 3$  pumps (black squares) or RD- $\alpha 1\beta 3$  pumps (red circles). In the case of wild type pumps, application of ouabain irreversibly inhibited the current and thus we had to perform the changes in  $\text{Na}^+$  concentration before and after ouabain, making the experiment technically challenging as small changes in non-Na/K-pump-mediated currents could mask the actual effect of  $\text{Na}^+$ . The points at both 1 and 5 mM  $\text{Na}^+$  are from 11 oocytes in wild type pumps and 15 oocytes in RD pumps.

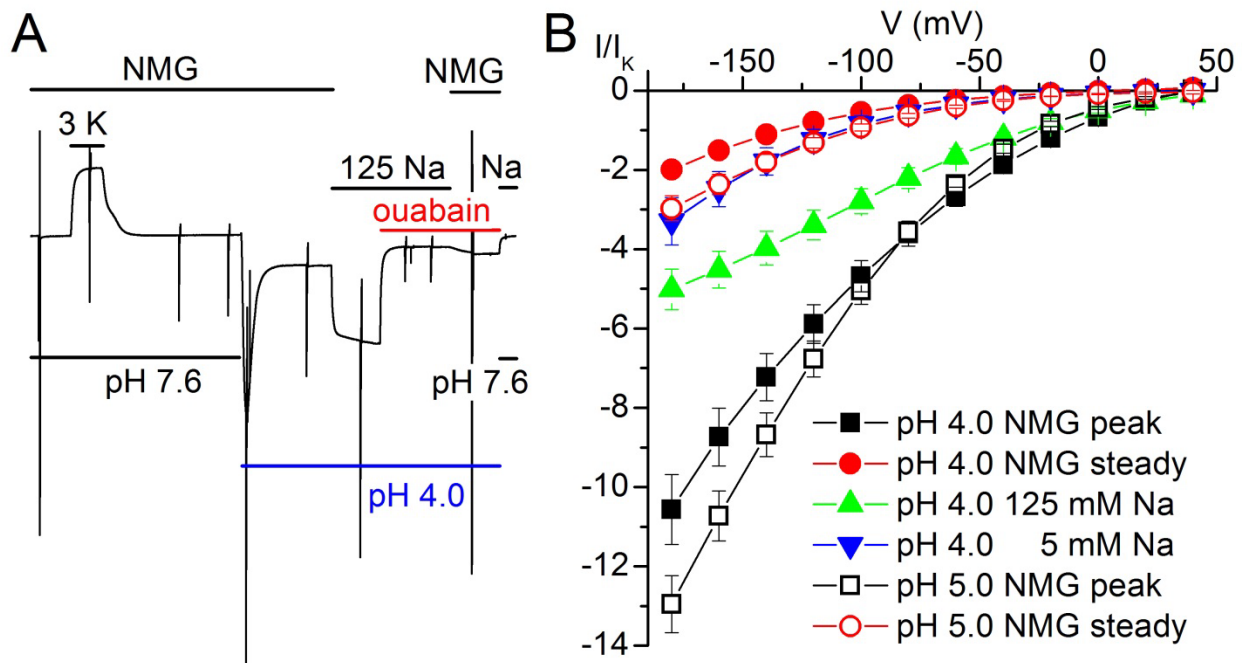

**Supplementary Fig. 3. Effect of pH 4.0 on  $I_H$ .** **A**) Continuous current recording from an oocyte injected with ouabain-resistant mutant RD- $\alpha 1\beta 3$  pumps held at -50 mV. Following pump current activation by 3 mM K in external NMG solution the external pH was dropped to pH 4.0 inducing a biphasic response, similar to that at pH 5.0 (Fig. 7) but with more complete inhibition and with lower relative peak (probably due to the faster inhibition (rate limited by solution exchange) observed at the lower pH,  $4.9 \pm 0.4$  s,  $n=7$ ). Application of 125 mM Na activated an inward current that was inhibited by subsequent application of ouabain. **B**) Ouabain-sensitive current-voltage relationship for peak and steady state currents at pH 4.0 and 5.0, and for the steady state current in the presence of 5 mM Na and in 125 mM Na at pH 4.0. Currents were normalized to the K-induced current at -40 mV.
